# Supplementary material
Source: HighWire-hosted journal article supplement (https://www.qdcxjkg.com/highwire/filestream/113298/field_highwire_adjunct_files/0/294684fr.pdf)
Supplement: 294684fr.pdf [file 294684fr.pdf]

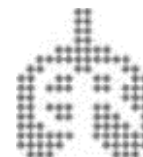

# Comparaison de l'association béclométasone/formotérol versus budésonide/formotérol dans le traitement de l'asthme

A. Papi<sup>\*</sup>, P.L. Paggiaro<sup>#</sup>, G. Nicolini<sup>¶</sup>, A.M. Vignola<sup>†</sup> et L.M. Fabbri<sup>§</sup> au nom du groupe<sup>f</sup> expérimentant un traitement par une association fixe de l'asthme par inhalation versus SYmbicort (ICAT SY)

**RESUME :** Cette étude a été réalisée afin de comparer l'association fixe de béclométasone et formotérol administrée via un aérosol doseur pressurisé avec gaz propulseur hydrofluoroalcane utilisant la technologie Modulite<sup>®</sup> (Chiesi Farmaceutici, Parme, Italie) à une association fixe de budésonide et de formotérol administrée via un inhalateur de poudre Turbuhaler<sup>®</sup> (AstraZeneca, Lund, Suède).

Il s'agissait d'une étude contrôlée de phase III, multinationale, multicentrique, en double-aveugle, double-placebo, randomisée, en deux groupes parallèles. A l'issue d'une période de préinclusion de 2 semaines, 219 patients présentant un asthme modéré à sévère ont été randomisés pour recevoir un traitement pendant 12 semaines soit 200 µg de béclométasone associés à 12 µg de formotérol administrés deux fois par jour via un aérosol doseur pressurisé, soit 400 µg de budésonide associés à 12 µg de formotérol administrés deux fois par jour via un inhalateur de poudre.

L'analyse de non-infériorité sur le critère principal, le débit expiratoire de pointe du matin au cours des deux dernières semaines de traitement, n'a pas montré de différence entre les groupes. Une amélioration statistiquement significative par rapport à l'inclusion a été observée dans les deux groupes sur la fonction pulmonaire, les symptômes et le recours au traitement de secours. Aucune différence n'a été observée entre les deux traitements tant sur le taux d'exacerbation que sur la fréquence des événements indésirables.

En terme d'efficacité et de profil de tolérance, la nouvelle association fixe de béclométasone et de formotérol en aérosol doseur pressurisé avec gaz propulseur hydrofluoroalcane (technologie Modulite<sup>®</sup>) est équivalente à l'association fixe commercialisée de budésonide et de formotérol.

**MOTS CLES :** asthme, béclométasone, budésonide, association fixe, particules ultrafines, formotérol

Les recommandations internationales préconisent d'associer un  $\beta_2$ -agoniste de longue durée d'action (BDLA) à une dose, faible à moyenne, de corticostéroïdes inhalés (CSI) chez les patients dont l'asthme n'est pas suffisamment contrôlé par un CSI seul [1]. Plusieurs essais cliniques ont démontré que l'adjonction d'un BDLA au CSI est plus bénéfique que la seule augmentation de la dose du CSI, tant pour le contrôle des symptômes que pour l'amélioration de la fonction respiratoire [2-6]. Un traitement à base d'une association CSI/LABA dans un dispositif unique, avec le même profil d'efficacité et de tolérance que les deux médicaments pris séparément, peut également permettre une meilleure observance [7-9]. Le dipropionate de béclométasone (BDP), CSI largement prescrit, possède un rapport

risque/efficacité favorable [10]. Le BDP a été récemment développé en formulation ultrafine avec comme gaz propulseur l'hydrofluoroalcane (HFA); sous cette formulation, il s'est révélé être efficace pour contrôler les symptômes d'asthme chez les adultes et les enfants à des doses quotidiennes 2,5 fois inférieures à celles du BDP ayant le chlorofluorocarbène comme gaz propulseur [11-13]. Le recours à un CSI en formulation ultrafine dans l'asthme est principalement basé sur un ensemble de preuves démontrant que l'inflammation et les modifications structurales bronchiques affectent l'ensemble des voies aériennes, y compris les bronchioles périphériques [14-20]. Puisque les formulations de particules ultrafines permettent au principe actif d'atteindre à la fois les bronches

## AFFILIATIONS

<sup>\*</sup>Research centre on Asthma and COPD, University of Ferrara, Ferrara,  
<sup>#</sup>Cardio-Thoracic Dept, Respiratory Pathophysiology, University of Pisa, Pise,  
<sup>¶</sup>Medical Dept, Chiesi Farmaceutici, Parme,  
<sup>†</sup>Institute of Lung Pathophysiology, National Research Council, Palermo, et,  
<sup>§</sup>Section of Respiratory Diseases, University of Modena, Modène, Italie.  
<sup>f</sup>La liste des membres se trouve dans la section Remerciements.

## CORRESPONDANCE

L.M. Fabbri  
Dept of Respiratory Diseases  
University of Modena & Reggio Emilia  
Via del Pozzo 71  
I-41100 Modena  
Italie  
Fax : 39 0594224231  
E-mail :  
[fabbri.leonardo@unimo.it](mailto:fabbri.leonardo@unimo.it)

Reçu  
le 21 juillet 2006  
Accepté après révision : le 03  
novembre 2006

**DECLARATION DE SOUTIEN**  
Cette étude a été commanditée par Chiesi Farmaceutici S.p.A. G. Nicolini est un employé du commanditaire de l'étude.

**DECLARATION D'INTERET**  
Des déclaration d'intérêt pour A. Papi, P.L. Paggiaro, G. Nicolini et L.M. Fabbri peuvent être trouvées sous  
[www.erj.ersjournals.com/misc/statements.shtml](http://www.erj.ersjournals.com/misc/statements.shtml)

European Respiratory  
Journal  
Print ISSN 0903-1936  
Online ISSN 1399-  
3003

centrales et périphériques [21], l'inflammation bronchique peut être ainsi traitée uniformément dans l'ensemble des voies aériennes. Une dose réduite de CSI implique une diminution de l'exposition systémique et un risque moindre d'effets secondaires spécifiques aux corticostéroïdes [22]. Une nouvelle technologie appelée Modulite® (Chiesi Farmaceutici, Parme, Italie), qui utilise un gaz propulseur HFA-134a, a été récemment développée pour obtenir une formulation extrafine de nouvelles molécules, mais également la reformulation de molécules existantes dans un aérosol doseur pressurisé [23]. Cette technologie a été utilisée pour développer la première association fixe contenant du BDP et du formotérol (F) en particules extrafines dans une solution en milieu HFA présentée dans un dispositif de type aérosol doseur pressurisé.

Le but principal de cette étude était d'évaluer si l'efficacité et la tolérance de l'association fixe BDP/F en aérosol doseur pressurisé avec gaz propulseur HFA Modulite® étaient non inférieures à celles d'une association budésonide (BUD)/F en inhalateur de poudre sèche Turbuhaler® (AstraZeneca, Lund, Suède) chez des patients présentant un asthme modéré à sévère et dont les symptômes n'étaient pas contrôlés par la seule administration d'un CSI.

L'association BUD/F a été choisie comme comparateur car elle contient le même BDLA, c'est-à-dire le formotérol. La formulation en particules extrafines de BDP permettant de délivrer au niveau pulmonaire un pourcentage plus élevé de la dose nominale, la dose de BDP utilisée dans cette étude est la moitié de la dose de BUD, ce qui est en accord avec les recommandations du GINA, qui considèrent que des doses quotidiennes de 400 µg de BDP en particules extrafines sont équivalentes à 800 µg de BUD [1].

## PATIENTS ET METHODES

### Patients

Cette étude a été conduite dans 13 centres en Europe. Les patients adultes âgés de 18 à 65 ans présentant un asthme persistant modéré à sévère avec un volume expiratoire maximal par seconde (VEMS) compris entre 50 et 80% des valeurs normales théoriques étaient éligibles pour participer à cette étude. Tous les patients étaient préalablement traités avec un CSI à une dose quotidienne  $\leq 1\ 000$  µg d'équivalent BDP et présentaient des symptômes d'asthme insuffisamment contrôlés. On entend par contrôle insuffisant: des symptômes diurnes plus d'une fois par semaine, des symptômes nocturnes plus de deux fois par mois et une utilisation quotidienne de  $\beta_2$ -agonistes à courte durée d'action. Ainsi, ces patients ne présentant pas un contrôle optimal malgré un traitement par des doses modérées à élevées de CSI selon GINA [1], ont été considérés comme asthmatiques persistants modérés. Cette classification reposait sur l'histoire récente de la maladie et devait être confirmée au cours de la période de préinclusion de 2 semaines.

Les patients remplissant un des critères suivants ont été exclus de l'étude : bronchopneumopathie chronique obstructive; fumeurs ou ex-fumeurs ( $\geq 10$  paquets/an) ; exacerbation sévère de l'asthme ou infection symptomatique des voies respiratoires au cours des 8 semaines précédentes; trois cures ou plus de corticostéroïdes oraux ou une hospitalisation due à l'asthme au cours des 6 mois précédents; traitement par BDLA, anticholinergiques ou antihistaminiques au cours des 2 semaines précédentes et/ou corticostéroïdes par voie topique ou intra-nasale et antagonistes des leucotriènes au cours des 4 semaines précédentes ; enfin changement de dose de CSI au cours des 4 semaines précédentes. Les patients présentant une

exacerbation d'asthme au cours de la période de pré-inclusion n'ont pas été inclus dans la phase de traitement. Par ailleurs, n'ont pas été randomisés, les patients présentant une augmentation de leur débit expiratoire de pointe (DEP)  $>15\%$  par rapport aux valeurs mesurées lors de la visite de sélection (après les 2 semaines de traitement de pré-inclusion avec  $\leq 1\ 000$  µg par jour d'équivalent de BDP). Ce seuil a servi de critère de réponse positive aux CSI seuls suggérant que ces patients ne nécessitaient pas un traitement par BDLA associé.

Cette étude a été réalisée conformément aux recommandations des Bonnes Pratiques Cliniques préconisées par la Conférence Internationale sur l'Harmonisation des Exigences Techniques. Le protocole a été approuvé par le comité d'éthique indépendant de chaque centre et un consentement éclairé écrit a été obtenu auprès de chaque participant avant le début de l'étude.

### Protocole d'étude

L'étude a été conçue pour évaluer la non-infériorité de l'association BDP/F par rapport à des doses équipotentes de l'association de BUD/F.

Cette étude contrôlée de phase III était multinationale, multicentrique, en double aveugle, double placebo, randomisée, en deux groupes parallèles. Les patients sélectionnés ont débuté l'étude par une période de pré-inclusion de 2 semaines avant d'être randomisés dans l'un des deux groupes. L'inhalation de salbutamol en traitement de secours était autorisé à tout moment sauf dans les 6 heures précédant les explorations fonctionnelles respiratoires (EFR). Les corticostéroïdes oraux n'étaient autorisés qu'en cas d'exacerbation. La prise de cromoglycate ou de nédocromil de sodium et de théophyllines par voie inhalée ou voie orale à l'inclusion dans l'étude pouvait être poursuivie à dose constante pendant toute la durée de l'étude. La prise de CSI a été poursuivie à une dose inchangée au cours de la période de pré-inclusion, tandis que tous les autres médicaments anti-asthmatiques n'étaient pas autorisés quelque soit la période l'étude.

A l'issue de la période de pré-inclusion, les symptômes et la prise de médicaments de secours ont été évalués et les patients dont l'asthme n'était pas contrôlé de manière satisfaisante ont été randomisés dans la phase de traitement de 12 semaines avec soit 100/6 µg de BDP/F via un aérosol doseur pressurisé (FOSTER™, Chiesi Farmaceutici) , soit 200/6 µg de BUD/F via un inhalateur de poudre (Symbicort® Turbuhaler®, AstraZeneca). Les deux médicaments de l'étude étaient administrés à la dose de deux inhalations deux fois par jour (matin et soir) afin d'obtenir des doses journalières de 400/24 µg de BDP/F ou de 800/ 24 µg de BUD/F. Etant donné que les formulations des médicaments de l'étude différaient, des inhalateurs placebo, respectivement aérosol doseur pressurisé et inhalateur de poudre ont également été donnés aux patients de chaque groupe afin de garantir le caractère en double aveugle (double placebo) de l'étude. Les dispositifs et leurs placebos respectifs étaient de formes et de couleurs identiques et les patients avaient reçu comme instruction de prendre deux inhalations de chaque dispositif le matin et le soir.

Il était demandé aux patients de se rendre au centre investigateur à six reprises aux intervalles prévus suivants :

inclusion dans l'étude (visite 1, début de la période de pré-inclusion), fin de la période de pré-inclusion/début de la période de traitement (visite 2, randomisation) et après 2, 4, 8 et 12 semaines de traitement (visites 3, 4, 5 et 6).

**Critères d'évaluation de l'étude**

Le critère principal d'évaluation était le DEP mesuré par les patients avant la prise matinale et au moins 12 h après la prise de la dose du soir précédent, au cours des 2 dernières semaines de la période de traitement (semaines 11 et 12). Des EFR ont été réalisées à chaque visite avec respect d'une fenêtre d'au moins 12 h après la dernière prise de traitement, la dose du matin étant prise dans le centre d'investigation clinique après les EFR. Les paramètres fonctionnels suivants ont été mesurés conformément aux procédures habituelles [24] : VEMS, capacité vitale forcée (CVF), DEP et débit expiratoire maximal médian à 50% de la capacité vitale (DEM<sub>50</sub>). Sur 3 mesures, la meilleure valeur a été utilisée pour l'analyse.

Les patients ont utilisé un débitmètre portable (Piko-1; Qubisoft, Padoue, Italie), répondant aux normes ATS (American Thoracic Society, 2004) afin de mesurer leur DEP et VEMS du matin et du soir avant la prise de leur traitement. La meilleure des trois mesures a été utilisée pour l'analyse des données. Les patients ont noté les symptômes d'asthme et les prises de salbutamol de secours deux fois par jour (le matin pour la période nocturne et le soir pour la période diurne) dans un carnet d'évaluation [5]. Le pourcentage de jours sans symptôme et sans prise de salbutamol (*c'est à dire* absence de symptôme pendant 24 h ou absence de prise de salbutamol) a été calculé.

Le nombre d'exacerbations a été évalué à chaque visite qui a suivi la visite initiale et les exacerbations ont été classées comme décrit précédemment selon les stades suivants : légère, modérée ou sévère [4].

Les événements indésirables (EI) ont été consignés pendant toute la durée de l'étude. Les signes vitaux (fréquence cardiaque et pression artérielle) ont également été mesurés à chaque visite. Un électrocardiogramme à 12 dérivations avec mesure de l'intervalle QT corrigé (QTc) a été effectué au début et à la fin de l'étude. Les patients ont consigné leurs prises de médicaments deux fois par jour dans leur carnet d'évaluation. Une prise comprise entre 75 et 125% de la dose théorique était considérée comme reflétant un degré d'observance satisfaisant.

**Statistiques**

Cette étude a été conçue pour évaluer la non-infériorité du BDP/F *par rapport* au BUD/F. La taille de l'échantillon a été calculée en définissant la limite de non-infériorité; elle était égale à la limite inférieure de l'intervalle de confiance (IC) unilatérale à 97,5% de la différence entre les moyennes (moindres carrés) du DEP du matin; elle était  $\geq -20 \text{ L}\cdot\text{min}^{-1}$ . Estimant un écart type de  $45 \text{ L}\cdot\text{min}^{-1}$  et une différence prévue entre les moyennes égale à zéro, un total de 90 patients était nécessaire dans chaque groupe afin d'obtenir une puissance  $>80\%$  pour satisfaire l'hypothèse susmentionnée [25]. L'association de BDP/F était définie comme non-inférieure à l'association de BUD/F si la limite inférieure de l'IC unilatérale à 97.5% pour la différence entre les moyennes (moindres carrés) était  $\geq -20 \text{ L}\cdot\text{min}^{-1}$ .

L'analyse des données a été effectuée sur les populations suivantes : population traitée (SAF), définie comme tous les patients randomisés pour lesquels il existait une preuve de prise de médicament ; population en intention de traiter (ITT) , *c'est à dire* tous les patients randomisés qui ont reçu au moins une dose du médicament de l'étude et avec des données postérieures au début de l'essai ; population avec ITT modifiée (mITT), *c'est à dire* excluant les données mesurées au cours

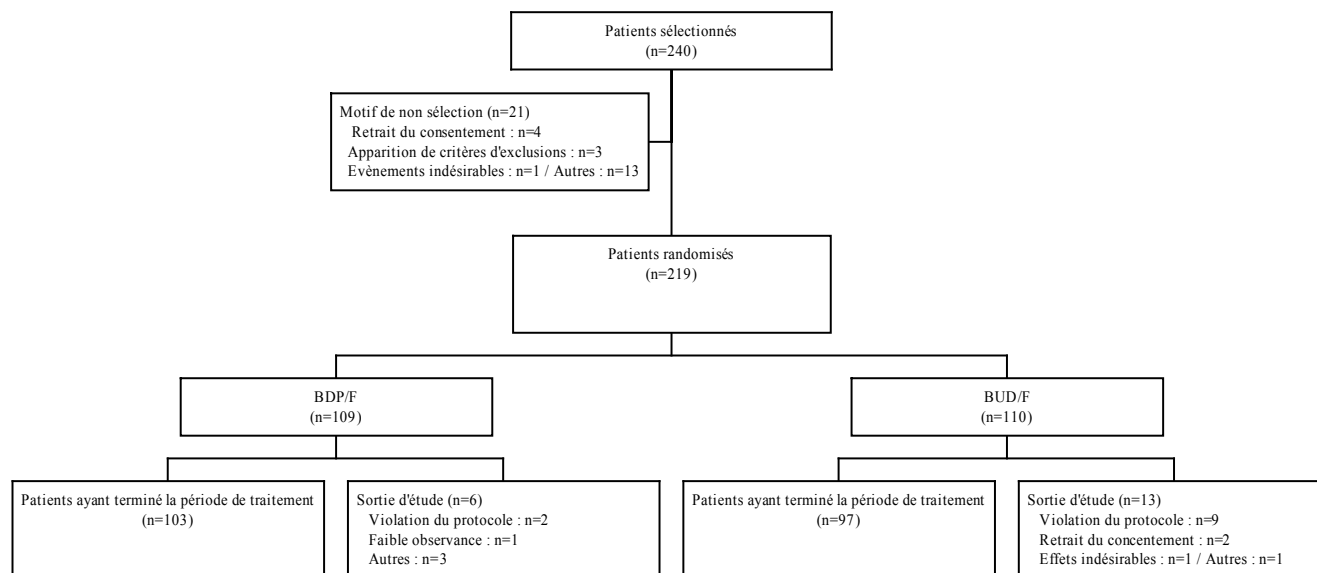

FIGURE 1. Répartition des patients. BDP/F: béclométazone/formotérol; BUD/F: budésonide/formotérol

des 30 jours après la prise de corticostéroïdes oraux pour exacerbation d'asthme; et population per protocole (PP), *c'est à dire* tous les patients de l'analyse ITT définie sans violations majeures du protocole (par exemple faible observance des produits et procédures de l'étude, utilisation de médicaments non autorisés). Les valeurs manquantes postérieures au début de l'essai ont été remplacées par la dernière mesure observée. La même méthode a été utilisée pour remplacer des données mesurées au cours des 30 jours suivant la prise de corticostéroïdes oraux pour la population mITT. Les valeurs initiales correspondaient aux valeurs moyennes de la dernière semaine de la période de pré-inclusion pour les critères notés quotidiennement par les patients sur les carnets d'évaluation et aux valeurs mesurées lors de la visite de fin de période de pré-inclusion pour les variables mesurées dans les centres investigateurs. Des moyennes bihebdomadaires ont également été calculées pendant toute la période de l'étude pour les critères issus des carnets d'évaluation. Les données démographiques et les valeurs initiales sont rapportées de façon descriptive (nombre de sujets, moyenne  $\pm$  écart type, médiane, minimum et maximum) ou par distribution de fréquences (nombre et pourcentage), de façon appropriée. Pour l'analyse du critère principal d'efficacité, le DEP de fin d'étude, l'IC unilatéral de 97,5% de la différence entre BDP/F et BUD/F (consigné par les patients dans le carnet d'évaluation) a été utilisé afin de démontrer la non-infériorité. Un modèle d'ANCOVA prenant en compte les termes traitement, région géographique et valeurs initiales comme covariables, a été utilisé. Le même modèle d'ANCOVA a été utilisé pour les critères secondaires d'efficacité.

Le nombre de patients présentant des exacerbations d'asthme dans les deux groupes a été évalué en terme de fréquence et un test du Chi 2 a été utilisé pour comparer les deux groupes de traitement. Le délai avant la première exacerbation a été comparé à l'aide des courbes de Kaplan–Meier. Le nombre de patients ayant connu des EI au cours de la période de traitement a été synthétisé et est présenté en distribution de fréquence.

Les différences entre les groupes de traitement ont été évaluées à l'aide du test du Chi 2 ou d'un test exact de Fisher bilatéral. Les résultats de l'ECG ont été présentés en terme de résultats normaux/anormaux, tandis que l'intervalle QTc a été analysé à l'aide d'un IC à 95% pour les valeurs finales à partir d'un modèle d'ANCOVA.

## RESULTATS

La description des patients et les caractéristiques initiales sont représentées sur la figure 1 et le tableau 1. Au total, 240

| TABLEAU 1                                                 | Caractéristiques à l'inclusion dans les deux groupes |                   |
|-----------------------------------------------------------|------------------------------------------------------|-------------------|
|                                                           | BDP/F#                                               | BUD/F             |
| <b>Homme</b>                                              | 45 (42,1)                                            | 46 (42,2)         |
| <b>Femme</b>                                              | 62 (57,9)                                            | 63 (57,8)         |
| <b>Age (ans)</b>                                          | 43,4 $\pm$ 12,3                                      | 46,0 $\pm$ 11,1   |
| <b>Poids (kg)</b>                                         | 72,2 $\pm$ 12,9                                      | 75,6 $\pm$ 16,3   |
| <b>Taille (cm)</b>                                        | 168,8 $\pm$ 9,6                                      | 168,7 $\pm$ 9,8   |
| <b>Allergies</b>                                          | 69 (64,5)                                            | 70 (64,2)         |
| <b>Dose de CSI ( <math>\mu</math>g) en équivalent BDP</b> | 787,9 $\pm$ 257,2                                    | 808,0 $\pm$ 262,7 |
| <b>Ancienneté de l'asthme (ans)</b>                       | 11,8 $\pm$ 9,5                                       | 12,4 $\pm$ 10,4   |
| <b>VEMS ( % préd)</b>                                     | 70,5 $\pm$ 10,7                                      | 69,3 $\pm$ 9,7    |
| <b>VEMS (L)</b>                                           | 2,30 $\pm$ 0,71                                      | 2,21 $\pm$ 0,64   |
| <b>VEMS % de réversibilité</b>                            | 23,6 $\pm$ 10,1                                      | 26,5 $\pm$ 12,1   |
| <b>DEP du matin (L·min<sup>-1</sup>)</b>                  | 308,9 $\pm$ 106,6                                    | 305,2 $\pm$ 100,0 |
| <b>DEP du soir (L·min<sup>-1</sup>)</b>                   | 317,5 $\pm$ 112,1                                    | 315,0 $\pm$ 98,5  |

Les données sont présentées en n (%) et moyenne  $\pm$  écart type. BDP/F : béclométasone/formotérol; BUD/F : budésonide/formotérol; CSI : corticostéroïdes inhalés; VEMS : volume expiratoire maximal par seconde; % préd : % prédit; DEP: débit expiratoire de pointe. Les valeurs p ont été considérées comme non significatives entre les groupes pour toutes les comparaisons. # Deux patients ont été exclus de la population en intention de traiter en raison de l'absence de données postérieures au début de l'étude.

| TABLEAU 2         | Populations analysées                                                                                                                                                                                                                                                                                                    |                                                                                                                                                                                                                                                                                                                                                                                                                                                                                                                                                                                        |
|-------------------|--------------------------------------------------------------------------------------------------------------------------------------------------------------------------------------------------------------------------------------------------------------------------------------------------------------------------|----------------------------------------------------------------------------------------------------------------------------------------------------------------------------------------------------------------------------------------------------------------------------------------------------------------------------------------------------------------------------------------------------------------------------------------------------------------------------------------------------------------------------------------------------------------------------------------|
|                   | BDP/F                                                                                                                                                                                                                                                                                                                    | BUD/F                                                                                                                                                                                                                                                                                                                                                                                                                                                                                                                                                                                  |
| <b>Randomisés</b> | n=109                                                                                                                                                                                                                                                                                                                    | n=110                                                                                                                                                                                                                                                                                                                                                                                                                                                                                                                                                                                  |
| <b>SAF</b>        | n=109                                                                                                                                                                                                                                                                                                                    | n=109                                                                                                                                                                                                                                                                                                                                                                                                                                                                                                                                                                                  |
| <b>ITT</b>        | n=107<br>Deux patients ne disposaient pas de données postérieures au début de l'étude sur le critère principal d'efficacité                                                                                                                                                                                              | n=109<br>Un patient ne présentait aucun signe de prise de médicament (randomisé et immédiatement sorti, carnet d'évaluation non complété)                                                                                                                                                                                                                                                                                                                                                                                                                                              |
| <b>m-ITT</b>      | n=107                                                                                                                                                                                                                                                                                                                    | n=109                                                                                                                                                                                                                                                                                                                                                                                                                                                                                                                                                                                  |
| <b>PP</b>         | n=103 : quatre patients exclus<br>Deux patients en raison d'une augmentation de >20% de DEP entre la visite 1 et la visite 2<br>Deux patients présentaient un intervalle >5 jours entre les deux dernières visites<br>Un patient n'avait pas pris de salbutamol pendant >5 jours au cours de la période de pré-inclusion | n=99 : 10 patients exclus<br>Quatre patients pour augmentation >20% de DEP entre la visite 1 et la visite 2<br>Trois patients pour faible observance des médicaments de l'étude<br>Deux patients ne montraient pas de prise de salbutamol pendant >5 jours au cours de la période de pré-inclusion<br>Un patient pour divergences significatives et non fiables entre les explorations fonctionnelles pulmonaires, c'est-à-dire VEMS et DEP, relevées quotidiennement par le patient et celles mesurées en clinique<br>Un patient pour exposition au médicament de l'étude <2 semaines |

BDP/F : béclométasone/formotérol; BUD/F : budésonide/formotérol; SAF : population traitée; ITT : population en intention de traiter; m-ITT : ITT modifiée; PP : population per protocole; DEP : débit expiratoire de pointe; VEMS : volume expiratoire maximal par seconde. Les patients peuvent être exclus pour plus d'un motif.

patients ont été sélectionnés et 219 ont été randomisés, tandis que 21 étaient considérés comme non éligibles. Un total de 109 (47,8%) patients a été randomisé dans le groupe BDP/F et 110 (52,2%) dans le groupe de BUD/F. Six patients du groupe BDP/F et 13 patients du groupe BUD/F ont été exclus de l'étude et 103 patients du groupe BDP/F et 97 patients du groupe BUD/F ont complété la période de 3 mois de l'étude.

Un patient du groupe BUD/F n'a pas pris le médicament à l'étude, la SAF comprenait ainsi 218 patients (109 dans chaque groupe). Deux patients traités avec l'association BDP/F ne possédaient pas de données postérieures au début de l'essai et ont été exclus de l'analyse ITT. Quatre patients du groupe BDP/F et 10 du groupe BUD/F ont également été exclus de l'analyse PP en raison de violations majeures du protocole. Etant donné la petite différence de nombre de patients au sein des populations ITT et PP (tableau 2), les résultats sont présentés uniquement pour la population ITT.

Les données initiales (tableau 1) des deux groupes étaient comparables en particulier en termes de démographie, de fonction respiratoire, de symptômes et d'ancienneté de l'asthme. Les deux groupes étaient comparables en terme des degrés initiaux de sévérité d'asthme et il n'y avait pas de différence entre les groupes en ce qui concerne la dose de CSI moyenne.

L'observance des patients dans les deux groupes était équivalente, avec un pourcentage moyen de prise du médicament de 96,8±3,2% et de 95,6±7,8% respectivement dans les groupes BDP/F et BUD/F.

**EFFICACITE**

**Fonction respiratoire**

En ce qui concerne le critère d'évaluation principal, le DEP du matin avant la prise de traitement au cours des 2 dernières semaines de la période de traitement, la différence entre les moyennes ajustées (moindres carrés) du groupe BDP/F (338,3 L·min<sup>-1</sup>) et du groupe BUD/F (337,8 L·min<sup>-1</sup>) s'élevait à 0,49 L·min<sup>-1</sup>. L'IC unilatéral à 97,5% de cette différence était de -11,97, valeur qui se situe dans la limite définie au préalable de -20 L·min<sup>-1</sup>, démontrant ainsi que l'association de BDP/F était non inférieure à l'association de BUD/F. Par ailleurs, l'IC bilatéral à 95% de la différence entre les moyennes ajustées se situait entre -11,97 et 12,95.

Comparés au début de l'étude, les deux groupes de patients s'amélioraient significativement sur les mesures de DEP du matin ; les augmentations moyennes entre le début et la fin de l'étude étaient de 29,43±52,8 L·min<sup>-1</sup> (95% IC : 19,31–39,54) et 28,63±43,4 L·min<sup>-1</sup> (20,39–36,87) respectivement dans les groupes BDP/F et BUD/F, (fig. 2). De même, aucune différence significative n'a été observée en terme de DEP du soir à la fin du traitement et une augmentation significative par rapport au début de l'essai a été observée dans les deux groupes. Les améliorations moyennes au cours des 2 dernières semaines de traitement étaient de 27,50±53,35 L·min<sup>-1</sup> et 27,43±39,39 L·min<sup>-1</sup> respectivement dans les groupes BDP/F et BUD/F (IC à 95% de la différence des moyennes ajustées : -12,26–11,94). Une augmentation significative *par rapport* aux valeurs initiales a été constatée dans les deux groupes sur le VEMS quotidien mesuré par les patients; mais sans différence significative à la fin du traitement entre les groupes considérés.

Les résultats des EFR réalisées lors des visites dans les centres (VEMS, CVF, DEP et DEM<sub>50</sub>) sont présentés dans le tableau 3 et la figure 3. Des améliorations significatives par rapport aux valeurs initiales ont été constatées dans les deux groupes à partir de la semaine 2 pour tous les paramètres fonctionnels, sans aucune différence significative entre les groupes à la fin du traitement.

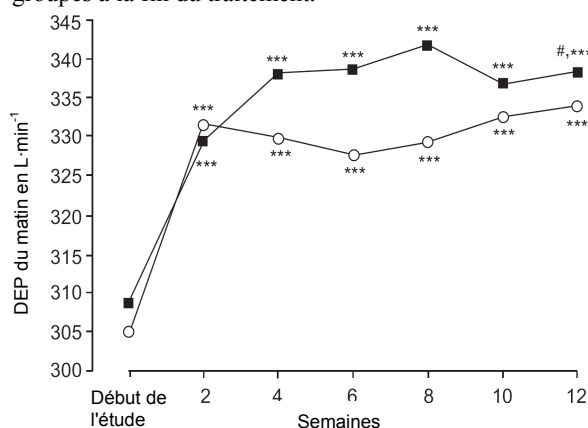

**FIGURE 2.** Débit expiratoire de pointe moyen du matin (DEP) mesuré chaque jour par les patients des deux groupes. ■ : Béclométhasone/formotérol ; ○ : budésonide/formotérol. # : p = valeur non significative entre les traitements. \*\*\* : p<0,001 *par rapport* au début de l'étude.

| TABLEAU 3                              |        | Fonction respiratoire dans les deux groupes lors des visites dans les centres investigateurs <sup>#</sup> |             |             |             |          |  |
|----------------------------------------|--------|-----------------------------------------------------------------------------------------------------------|-------------|-------------|-------------|----------|--|
| Mesures                                | Groupe | Semaine 2                                                                                                 | Semaine 4   | Semaine 8   | Semaine 12  | valeur p |  |
| VEMS (L)                               | BDP/F  | 0,26±0,38                                                                                                 | 0,29±0,46   | 0,33±0,49   | 0,28±0,47   | 0,354    |  |
|                                        | BUD/F  | 0,33±0,41                                                                                                 | 0,37±0,44   | 0,40±0,44   | 0,33±0,44   |          |  |
| CVF (L)                                | BDP/F  | 0,23±0,47                                                                                                 | 0,27±0,53   | 0,33±0,54   | 0,26±0,52   | 0,557    |  |
|                                        | BUD/F  | 0,26±0,49                                                                                                 | 0,31±0,53   | 0,34±0,52   | 0,21±0,52   |          |  |
| DEP (L·min <sup>-1</sup> )             | BDP/F  | 52,29±72,81                                                                                               | 59,99±74,03 | 63,66±74,28 | 56,04±72,97 | 0,806    |  |
|                                        | BUD/F  | 55,71±74,35                                                                                               | 57,47±71,25 | 64,36±75,94 | 53,16±77,29 |          |  |
| DEM <sub>50</sub> (L·s <sup>-1</sup> ) | BDP/F  | 0,42±0,66                                                                                                 | 0,43±0,71   | 0,48±0,84   | 0,43±0,82   | 0,512    |  |
|                                        | BUD/F  | 0,48±0,69                                                                                                 | 0,53±0,75   | 0,63±0,86   | 0,50±0,80   |          |  |

Sauf indication contraire, les données sont présentées sous forme de moyenne ± écart type. VEMS : volume expiratoire maximal par seconde ; CVF : capacité vitale forcée; DEP : débit expiratoire de pointe; DEM<sub>50</sub> : débit expiratoire maximal médian à 50% de la capacité vitale; BDP/F : béclométhasone/formotérol ; BUD/F : budésonide/formotérol. Les valeurs p se rapportent à la comparaison des valeurs au point final (semaine 12, dernière visite) entre les groupes <sup>#</sup> : changements moyens par rapport au début de l'étude (population avec intention de traiter)

Les symptômes cliniques ainsi que l'utilisation journalière de salbutamol de secours ont diminué de manière significative par rapport au début de l'étude dans les deux groupes à partir de la deuxième semaine de traitement, sans différence significative entre les groupes à la fin du traitement.

Les diminutions moyennes de symptômes diurnes entre le début de l'étude et le point final (semaines 11 et 12) se chiffraient à  $-0,93 \pm 0,78$  U et  $-0,86 \pm 0,86$  U respectivement dans les groupes BDP/F et BUD/F, ( $p < 0,001$  par rapport au début de l'étude). L'évolution des symptômes nocturnes entre le début de l'étude et la fin du traitement étaient de  $-0,73 \pm 0,75$  U et  $-0,66 \pm 0,84$  U respectivement dans les groupes BDP/F et BUD/F ( $p < 0,001$  par rapport aux valeurs initiales au début de l'étude). L'utilisation quotidienne de médicament de secours a diminué de manière significative passant de  $2,16 \pm 1,15$  bouffées par jour pendant la dernière semaine de la période de pré-inclusion à  $0,76 \pm 0,92$  bouffées par jour au cours des 2 dernières semaines de la période de traitement dans le groupe BDP/F, et de  $2,28 \pm 1,50$  à  $0,87 \pm 1,04$  bouffées par jour dans le groupe BUD/F.

Les pourcentages moyens de journées sans symptôme ou de journées sans utilisation de salbutamol pendant toute la durée du traitement sont représentés sur la figure 4. Il n'apparaît aucune différence significative entre les deux groupes, mais une amélioration statistiquement significative est obtenue dans les deux groupes lorsque les données sont comparées à celles du début de l'étude ( $p < 0,001$ ).

### Exacerbations

29 patients ont eu des exacerbations d'asthme, 17 (15,9%) dans le groupe BDP/F et 12 (11,0%) dans le groupe BUD/F. Aucune exacerbation sévère n'est survenue, tandis que seuls deux patients de chaque groupe ont rapporté des exacerbations modérées nécessitant une cure de corticostéroïdes oraux. Le ratio jours d'exacerbation sur jours d'exposition au traitement était de  $0,013 \pm 0,04\%$  dans le groupe BDP/F et  $0,023 \pm 0,11\%$  dans le groupe BUD/F ( $p = 0,38$ ), c'est-à-dire sans différence sur le plan statistique. Le délai (durée moyenne) avant l'apparition de la première exacerbation était de 29 jours (1 à 77) dans le groupe BDP/F et de 24 jours (1 à 69) dans le groupe BUD/F ( $p = 0,342$  entre les groupes selon la méthode d'estimation de Kaplan-Meier pour les courbes de survie).

### Tolérance

Comme indiqué dans le tableau 4, aucune différence significative n'a été observée entre les deux groupes de traitement. Des EI ont été signalés par 15 (13,8%) patients du groupe BDP/F et 18 (16,5%) du groupe BUD/F mais aucun n'a été classé comme grave. Seul un patient du groupe BUD/F a interrompu l'étude en raison d'un mal de gorge, de palpitations et de tremblements des mains.

Aucune modification de la tension artérielle systémique n'a été observée dans les groupes pendant la durée de l'étude. Une augmentation légère mais significative de la fréquence cardiaque a été observée uniquement lors de la visite 3 dans le groupe BUD/F ( $1,67 \pm 6,71$  bpm; 95% IC : 0,39 à 2,95). Aucun autre changement significatif n'a été constaté dans aucun des groupes. Aucune modification de l'ECG ou allongement de l'intervalle QTc n'a été signalé dans les deux groupes.

### Discussion

Dans cette étude, les effets du nouvel aérosol doseur pressurisé contenant l'association fixe de BDP/F ont été

comparés à une association fixe de BUD/F administrée via un inhalateur de poudre Turbuhaler® sur une période de 3 mois chez des patients atteints d'asthme modéré à sévère. Les résultats de l'étude ont montré que 400/24 µg par jour de BDP/F via un aérosol doseur pressurisé étaient aussi efficaces que 800/24 µg par jour de BUD/F sur le DEP du matin au cours des 2 dernières semaines du traitement. Cela a été aussi confirmé sur les autres paramètres de la fonction respiratoire et sur les critères d'efficacité clinique évalués.

Les deux groupes de traitement étaient équilibrés en ce qui concerne la sévérité de l'asthme et des valeurs initiales de tous les critères d'évaluation. La population dans chaque groupe avait un réel potentiel d'amélioration entre le début et la fin de l'étude, comme cela a été démontré par la progression de la fonction respiratoire au cours de l'étude, montrant une réelle équivalence entre les deux traitements. De plus, on a l'assurance que cette équivalence n'était la conséquence ni d'un manque d'efficacité des deux traitements, ni d'une fonction respiratoire déjà optimale avant le début du traitement. [26]. Cette étude possédait la puissance nécessaire pour détecter des différences entre les deux groupes comme en attestent les améliorations statistiquement et cliniquement significatives des principaux critères d'évaluation.

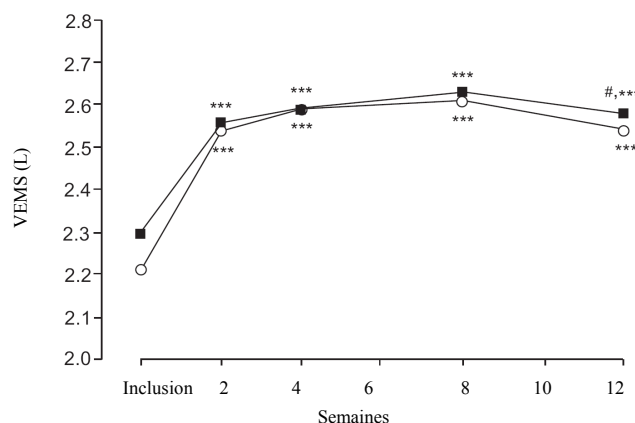

**FIGURE 3 :** Volume respiratoire maximum en 1 seconde (VEMS) mesuré en consultation dans les deux groupes.

■ : béclométasone/formotérol; □ : budésonide/formotérol. # : p = non significatif entre traitements. \*\*\* : p < 0,001 versus inclusion

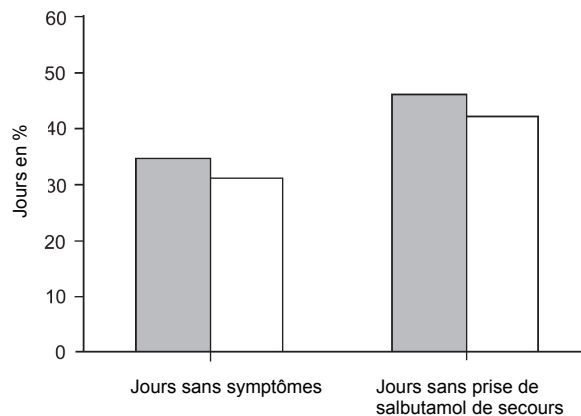

**FIGURE 4.** Pourcentage de jours sans symptômes et de jours sans prise de salbutamol de secours pendant la phase de traitement.

■ : Béclométasone/formotérol; □ : budésonide/formotérol. p = différence entre les deux groupes non significative

Les résultats des autres paramètres de la fonction respiratoire, qu'ils aient été mesurés par les patients deux fois par jour ou lors des visites dans les centres, montrent une amélioration comparable entre les deux groupes, sans qu'une différence significative soit observée entre les traitements. Des améliorations comparables dans les deux groupes ont également été observées dans l'évaluation des symptômes cliniques et dans l'utilisation de salbutamol en traitement de secours, laquelle a sensiblement diminué par rapport au début de l'étude, sans différence entre les groupes. De même, il n'a été constaté aucune différence dans le taux d'exacerbations et le délai de survenue de la première exacerbation. Toutefois, il n'a pas été possible de considérer le nombre d'exacerbations comme un critère d'évaluation principal car la période de traitement était limitée et un plus grand nombre de patients aurait été nécessaire pour pouvoir détecter des éventuelles différences entre les traitements.

Les deux associations fixes ont montré un profil de tolérance similaire. Au cours des trois mois de l'étude, la nouvelle association de BDP/F a été au moins aussi bien tolérée que l'association standard contenant du BUD, un CSI doté d'une faible activité systémique [27]. Les événements indésirables les plus fréquents ont été une aggravation de l'asthme et des infections des voies respiratoires supérieures/inférieures, vraisemblablement dues à des infections saisonnières plutôt qu'à des problèmes de tolérance des traitements, comme le suggère leur fréquence similaire dans les deux groupes. Il n'a pas été mis en évidence de modification de l'ECG ou d'allongement de l'intervalle QTc, effet cardiovasculaire potentiel des médicaments  $\beta_2$ -adrénergiques [28].

Un traitement utilisant un seul système d'inhalation associant un BDLA à un CSI s'avère avantageux à la fois pour l'observance du traitement et pour la fonction pulmonaire à long terme [3, 29]. Ce traitement permet au patient de ressentir le soulagement de ses symptômes grâce au BDLA, améliorant ainsi l'observance du traitement, tout en recevant une dose d'entretien de CSI qui agit sur l'inflammation chronique des voies respiratoires, ce qui permet d'améliorer le contrôle de la maladie. De plus, l'utilisation d'associations fixes permet de réduire les coûts de traitement, directs et indirects par rapport à une administration des mêmes médicaments à l'aide de deux inhalateurs distincts [9]. Etant donné les avantages démontrés qu'offre l'administration combinée des BDLA/CSI, la nouvelle association BDP/F représente une alternative valable pour le traitement de l'asthme. Etant donné que le BDP administré via un aérosol doseur pressurisé est un CSI reconnu et utilisé à l'échelle mondiale, la mise à disposition d'une nouvelle association de BDP/F peut aussi permettre aux patients dont l'asthme n'est pas contrôlé de manière satisfaisante par le CSI seul, de continuer à utiliser le même dispositif avec la même technique d'inhalation et la même molécule.

Bien que la dose nominale journalière de BDP utilisée dans cette étude soit deux fois inférieure à la dose quotidienne équivalente de BUD présente dans l'association BUD/F, il est impossible de revendiquer que le BDP sous forme de particules ultrafines est deux fois plus puissant que le BUD, la dose minimale requise pour parvenir à contrôler l'asthme n'étant pas établie.

**TABLEAU 4** Événements indésirables observés chez >2% des patients, nombre et pourcentage de la population analysée pour la tolérance

| Événements indésirables                   | BDP/F     | BUD/F     |
|-------------------------------------------|-----------|-----------|
| <b>Sujets (n)</b>                         | 109       | 109       |
| <b>Aggravation de l'asthme</b>            | 16 (14,7) | 12 (11,0) |
| <b>Infections des voies respiratoires</b> | 6 (5,5)   | 7 (6,4)   |
| <b>Bronchite</b>                          | 7 (6,4)   | 5 (4,6)   |
| <b>Rhinopharyngite</b>                    | 2 (1,8)   | 5 (4,6)   |
| <b>Infection par herpès simplex</b>       | 3 (2,8)   | 1 (0,9)   |
| <b>Tremblements</b>                       | 1 (0,9)   | 3 (2,8)   |

Sauf indication contraire, les données sont indiquées en n (%).  
BDP/F : Béclométazone/formotérol ; BUD/F : budésonide/formotérol.

De même, la différence de dose de corticostéroïdes entre les deux groupes de traitement n'implique pas de différence d'exposition systémique, car cela ne dépend pas seulement de la dose nominale mais également de la quantité de médicament atteignant les poumons et des propriétés pharmacocinétiques des deux corticostéroïdes. Des études antérieures ont indiqué que la dose de BUD en fines particules, *c'est-à-dire* la quantité nécessaire supposée atteindre les voies respiratoires périphériques après une inhalation de 200/6  $\mu\text{g}$  BUD/F en combinaison par inhalateur de poudre, s'élève à 46,0  $\mu\text{g}$  [30], tandis que la dose de BDP en fines particules après une inhalation de 100/6  $\mu\text{g}$  BDP/F extra-fin, est de 34,5  $\mu\text{g}$  [31].

En conclusion, cette étude est la première à comparer l'efficacité et la tolérance d'un nouvel aérosol doseur pressurisé contenant l'association BDP/F avec une association standard de BUD/F chez des patients présentant un asthme modéré à sévère dont les symptômes n'étaient pas contrôlés de manière satisfaisante par un seul CSI. Les résultats ont montré que les deux associations testées entraînent un bénéfice équivalent en ce qui concerne la fonction pulmonaire et les symptômes cliniques et qu'elles ont entraîné une diminution significative de l'utilisation de médicaments de secours. De plus, il n'a été observé aucune différence notable entre les groupes en termes de fréquences d'exacerbation de l'asthme et/ou de besoin de traitements supplémentaires.

Cette étude a montré que le nouvel aérosol doseur pressurisé contenant l'association de béclométazone/ formotérol est une alternative recevable pour le traitement de l'asthme.

#### REMERCIEMENTS

Les membres de l'ICAT SY study group sont: J. Zarkovic (Ambulance for Paediatrics and Pulmonology, Wien, Austria); K. Buczyłko (Centrum Alergologii, Lodz, Poland), I. Grzelewska-Rzymowska (Uniwersytet Medyczny, Lodz, Poland), B. Łukasiewicz-Swierczyn'ska (Nzoz "Medex" Poradnia Alergologiczna, Bielsko-Biala, Poland), B. Panaszek (Nzoz Lekarze Specjalisci, Wroclaw, Poland), W. Piotrowski (Prywatny Gabinet Lekarski, Lodz, Poland), M. Stobiecki (Centrum Usług Medycznych, Krakow, Poland), Y. Feschenko (Pulmonology Dept, Therapy and Clinical Pharmacology of Lung Diseases, Institute of Physiology and Pulmonology, Academy of Medical Sciences, Kiev,

Ukraine), N. Gorovenko (Dept of Medical Genetics, Clinical Immunology and Allergology, Kiev Medical Academy of Post-diploma Education, Kiev, Ukraine), L. Yashyna (Dept of Diagnostic, Therapy and Clinical Pharmacology of Lung Diseases, Institute of Physiology and Pulmonology Academy of Medical Sciences, Kiev, Ukraine), T. Pertseva (Internal Medicine Dept, Dniepropetrovsk State Medical Academy, City Clinical Hospital, Dniepropetrovsk, Ukraine), J. Semidotskaya (Pulmonological and Allergological Dept, Kharkov Regional Clinical Hospital, Kharkov, Ukraine), and V. Vyacheslavovich Yefimov (Pulmonology Dept, Institute of Therapy, Ukrainian Academy of Medical Science, Kharkiv, Ukraine).

## REFERENCES

- Global Initiative for Asthma, National Institute of Health, National Heart Lung and Blood Institute, NHLBI/WHO Workshop Report. Global strategy for asthma management and prevention. NHLBI/WHO workshop report no. 02-3659 January 1995, updated 2003. Bethesda, NHLBI, 2003.
- Bateman ED, Bantje TA, Joao Gomes M, *et al.* Combination therapy with single inhaler budesonide/formoterol compared with high dose of fluticasone propionate alone in patients with moderate persistent asthma. *Am J Respir Med* 2003; 2: 275–281.
- Laloo UG, Malolepszy J, Kozma D, *et al.* Budesonide and formoterol in a single inhaler improves asthma control compared with increasing the dose of corticosteroid in adults with mild-to-moderate asthma. *Chest* 2003; 123:1480–1487.
- Pauwels RA, Lofdahl CG, Postma DS, *et al.* Effect of inhaled formoterol and budesonide on exacerbations of asthma. Formoterol and Corticosteroids Establishing Therapy (FACET) International Study Group. *N Engl J Med* 1997; 337: 1405–1411.
- Ringdal N, Chuchalin A, Chovan L, Tudoric N, Maggi E, Whitehead PJ. Evaluation of different inhaled combination therapies (EDICT): a randomised, double-blind comparison of Seretide (50/250 microg bd) Diskus *versus* formoterol (12 microg bd) and budesonide (800 microg bd) given concurrently (both *via* Turbuhaler) in patients with moderate-to-severe asthma. *Respir Med* 2002; 96: 851–861.
- Tal A, Simon G, Vermeulen JH, *et al.* Budesonide/formoterol in a single inhaler *versus* inhaled corticosteroids alone in the treatment of asthma. *Pediatr Pulmonol* 2002; 34: 342–350.
- Aubier M, Pieters WR, Schlosser NJ, Steinmetz KO. Salmeterol/fluticasone propionate (50/500 microg) in combination in a Diskus inhaler (Seretide) is effective and safe in the treatment of steroid-dependent asthma. *Respir Med* 1999; 93: 876–884.
- Chapman KR, Ringdal N, Backer V, Palmqvist M, Saarelainen S, Briggs M. Salmeterol and fluticasone propionate (50/250 microg) administered *via* combination Diskus inhaler: as effective as when given *via* separate Diskus inhalers. *Can Respir J* 1999; 6: 45–51.
- Rosenhall L, Elvstrand A, Tilling B, *et al.* One-year safety and efficacy of budesonide/formoterol in a single inhaler (Symbicort Turbuhaler) for the treatment of asthma. *Respir Med* 2003; 97: 702–708.
- Brogden RN, Heel RC, Speight TM, Avery GS. Beclomethasone dipropionate. A reappraisal of its pharmacodynamic properties and therapeutic efficacy after a decade of use in asthma and rhinitis. *Drugs* 1984; 28: 99–126.
- Fireman P, Prenner BM, Vincken W, Demedts M, Mol SJ, Cohen RM. Long-term safety and efficacy of a chlorofluorocarbon-free beclomethasone dipropionate extrafine aerosol. *Ann Allergy Asthma Immunol* 2001; 86:557–565.
- Pedersen S, Warner J, Wahn U, *et al.* Growth, systemic safety, and efficacy during 1 year of asthma treatment with different beclomethasone dipropionate formulations: an open-label, randomized comparison of extrafine and conventional aerosols in children. *Pediatrics* 2002; 109: e92.
- Van Schayck CP, Donnell D. The efficacy and safety of QVAR (hydrofluoroalkane-beclomethasone dipropionate extrafine aerosol) in asthma (part 1): an update of clinical experience in adults. *Int J Clin Pract* 2004; 58:678–688.
- Bai TR, Knight DA. Structural changes in the airways in asthma: observations and consequences. *Clin Sci (Lond)* 2005; 108: 463–477.
- Bel EH. Clinical phenotypes of asthma. *Curr Opin Pulm Med* 2004; 10: 44–50.
- Boxall C, Holgate ST, Davies DE. The contribution of transforming growth factor- $\beta$  and epidermal growth factor signalling to airway remodelling in chronic asthma. *Eur Respir J* 2006; 27: 208–229.
- Hamid Q, Song Y, Kotsimbos TC, *et al.* Inflammation of small airways in asthma. *J Allergy Clin Immunol* 1997; 100:44–51.
- Sutherland ER, Martin RJ. Distal lung inflammation in asthma. *Ann Allergy Asthma Immunol* 2002; 89: 119–124.
- Vignola AM, Riccobono L, Profita M, *et al.* Effects of low doses of inhaled fluticasone propionate on inflammation and remodelling in persistent-mild asthma. *Allergy* 2005; 60: 1511–1517.
- Wenzel S. Severe asthma in adults. *Am J Respir Crit Care Med* 2005; 172: 149–160.
- Leach CL, Davidson PJ, Boudreau RJ. Improved airway targeting with the CFC-free HFA-beclomethasone metered-dose inhaler compared with CFC-beclomethasone. *Eur Respir J* 1998; 12: 1346–1353.
- Vanden Burgt JA, Busse WW, Martin RJ, Szeffler SJ, Donnell D. Efficacy and safety overview of a new inhaled corticosteroid, QVAR (hydrofluoroalkane-beclomethasone extrafine inhalation aerosol), in asthma. *J Allergy Clin Immunol* 2000; 106: 1209–1226.
- Bousquet J. Introduction. Modulite: simplifying the changeover. *Respir Med* 2002; 96: Suppl. D, S1–S2.
- Quanjer PH, Tammeling GJ, Cotes JE, Pedersen OF, Peslin R, Yernault JC. Lung volumes and forced ventilatory flows. Report Working Party Standardization of Lung Function Tests, European Community for Steel and Coal. Official Statement of the European Respiratory Society. *Eur Respir J Suppl* 1993; 16: 5–40.
- Jones B, Jarvis P, Lewis JA, Ebbutt AF. Trials to assess equivalence: the importance of rigorous methods. *BMJ* 1996; 313: 36–39.
- Ebbutt AF, Frith L. Practical issues in equivalence trials. *Stat Med* 1998; 17: 1691–1701.
- O'Byrne PM, Pedersen S. Measuring efficacy and safety of different inhaled corticosteroid preparations. *J Allergy Clin Immunol* 1998; 102: 879–886.
- Rabe KF. Formoterol in clinical practice--safety issues. *Respir Med* 2001; 95: Suppl. B, S21–S25.
- Lotvall J. Combination therapy in asthma--fixed or variable dosing in different patients? *Curr Med Res Opin* 2004; 20:1711–1727.
- Tarsin WY, Pearson SB, Assi KH, Chrystyn H. Emitted dose estimates from Seretide Diskus and Symbicort Turbuhaler following inhalation by severe asthmatics. *Int J Pharm* 2006; 316: 131–137.
- Lewis D, Brambilla G, Church T. BDP and formoterol association within a combination HFA solution MDI. *Respir Drug Delivery* 2006; 3: 939–942.
